# Supplementary material
Source: PubMed Central journal article supplement (PMC3618598)
Supplement: NIHMS438391-supplement-Supp_Fig_S1-S3_Supp_Table_S1-S3.pdf [file NIHMS438391-supplement-Supp_Fig_S1-S3_Supp_Table_S1-S3.pdf]

Table S1. Genotype information and least square means (standard error in parenthesis) of all traits in the original scale.

| Genotype | Subspecies | Geography  | In 19 subset | Latitude | Longitude | Instantaneous WUE dry | Instantaneous WUE wet | Long-term $\Delta^{13}C$ dry | Long-term $\Delta^{13}C$ wet | Bolting time   |
|----------|------------|------------|--------------|----------|-----------|-----------------------|-----------------------|------------------------------|------------------------------|----------------|
| BNK      | East       | Allopatric | Yes          | 44.79    | -113.31   | 4.028 (0.248)         | 3.988 (0.317)         | -30.068 (0.215)              | -30.459 (0.191)              | 29.312 (0.539) |
| ECMF     | East       | Allopatric | Yes          | 44.54    | -112.62   | 4.028 (0.248)         | 4.460 (0.309)         | -30.520 (0.215)              | -31.456 (0.191)              | 26.479 (0.528) |
| HMC      | East       | Allopatric | Yes          | 44.52    | -112.19   | 4.028 (0.248)         | 3.817 (0.384)         | -30.335 (0.215)              | -30.935 (0.191)              | 34.671 (0.801) |
| MAH      | East       | Allopatric | No           | 44.18    | -113.74   | 4.028 (0.248)         | 4.076 (0.309)         | -30.431 (0.215)              | -30.722 (0.191)              | 26.725 (0.528) |
| MIL      | East       | Allopatric | No           | 44.37    | -113.36   | 4.028 (0.248)         | 4.051 (0.312)         | -29.856 (0.215)              | -30.528 (0.191)              | 29.839 (0.528) |
| PCS      | East       | Allopatric | Yes          | 44.03    | -113.45   | 4.028 (0.248)         | 5.589 (0.309)         | -31.578 (0.215)              | -32.048 (0.191)              | 34.100 (0.528) |
| BHS      | East       | Sympatric  | Yes          | 44.41    | -114.41   | 4.506 (0.260)         | 4.253 (0.318)         | -31.966 (0.215)              | -31.023 (0.191)              | 30.345 (0.539) |
| EGM      | East       | Sympatric  | Yes          | 45.54    | -113.83   | 4.506 (0.260)         | 4.226 (0.499)         | -30.614 (0.215)              | -31.108 (0.191)              | 34.457 (1.670) |
| FLF      | East       | Sympatric  | Yes          | 44.80    | -113.80   | 4.506 (0.260)         | 4.730 (0.310)         | -31.352 (0.215)              | -31.052 (0.191)              | 29.355 (0.528) |
| JAM      | East       | Sympatric  | No           | 44.97    | -114.09   | 4.506 (0.260)         | 4.541 (0.317)         | -30.942 (0.215)              | -31.074 (0.191)              | 29.281 (0.551) |
| MFP      | East       | Sympatric  | Yes          | 44.96    | -114.66   | 4.506 (0.260)         | 4.244 (0.370)         | -30.908 (0.215)              | -30.769 (0.191)              | 29.211 (0.735) |
| PAR      | East       | Sympatric  | No           | 44.62    | -114.52   | 4.506 (0.260)         | 4.492 (0.310)         | -30.951 (0.215)              | -31.656 (0.191)              | 31.240 (0.528) |
| BSC      | West       | Allopatric | Yes          | 44.42    | -115.47   | 4.116 (0.249)         | 4.729 (0.333)         | -30.099 (0.215)              | -32.086 (0.191)              | 33.553 (0.606) |
| BVC      | West       | Allopatric | Yes          | 44.41    | -115.37   | 4.116 (0.249)         | 4.384 (0.310)         | -29.997 (0.215)              | -31.475 (0.191)              | 38.054 (0.528) |
| DDW      | West       | Allopatric | Yes          | 44.30    | -115.48   | 4.116 (0.249)         | 4.750 (0.310)         | -30.455 (0.215)              | -32.182 (0.191)              | 37.644 (0.528) |
| THT      | West       | Allopatric | Yes          | 44.37    | -115.14   | 4.116 (0.249)         | 4.480 (0.309)         | -30.042 (0.215)              | -31.469 (0.191)              | 33.219 (0.528) |
| VNH      | West       | Allopatric | Yes          | 44.41    | -115.29   | 4.116 (0.249)         | 4.775 (0.309)         | -30.684 (0.215)              | -31.477 (0.191)              | 38.381 (0.528) |
| WHC      | West       | Allopatric | Yes          | 44.57    | -115.54   | 4.116 (0.249)         | 4.592 (0.368)         | -31.155 (0.215)              | -31.242 (0.191)              | 36.963 (0.763) |
| BHM      | West       | Sympatric  | Yes          | 44.41    | -114.38   | 3.911 (0.242)         | 4.473 (0.309)         | -30.092 (0.215)              | -30.781 (0.191)              | 32.116 (0.528) |
| BVM      | West       | Sympatric  | Yes          | 44.79    | -113.78   | 3.911 (0.242)         | 5.035 (0.309)         | -30.152 (0.215)              | -30.916 (0.191)              | 36.787 (0.528) |
| IRF      | West       | Sympatric  | Yes          | 44.94    | -114.12   | 3.911 (0.242)         | 4.457 (0.308)         | -30.569 (0.215)              | -31.655 (0.191)              | 37.443 (0.528) |
| LTM      | West       | Sympatric  | Yes          | 45.71    | -113.99   | 3.911 (0.242)         | 4.469 (0.308)         | -30.264 (0.215)              | -30.931 (0.191)              | 38.344 (0.528) |
| Ruby     | West       | Sympatric  | No           | 45.55    | -113.76   | 3.911 (0.242)         | 4.706 (0.311)         | -30.336 (0.215)              | -30.878 (0.191)              | 50.800 (0.528) |
| UpSil    | West       | Sympatric  | Yes          | 44.91    | -114.39   | 3.911 (0.242)         | 4.151 (0.309)         | -30.250 (0.215)              | -31.349 (0.191)              | 38.344 (0.528) |

| Genotype | Flowering time | Flowering duration | Flowering rosette width | Flowering height | Flowering leaf number | Flowering rosette number | Flowering stalk number | Main stalk diameter |
|----------|----------------|--------------------|-------------------------|------------------|-----------------------|--------------------------|------------------------|---------------------|
| BNK      | 9.758 (0.689)  | 17.200 (1.299)     | 103.066 (2.640)         | 192.020 (8.342)  | 46.959 (2.342)        | 1.074 (0.109)            | 1.034 (0.078)          | 2.751 (0.072)       |
| ECMF     | 9.225 (0.676)  | 12.932 (1.272)     | 81.178 (2.592)          | 318.143 (8.195)  | 68.943 (2.302)        | 1.223 (0.107)            | 1.142 (0.077)          | 2.713 (0.071)       |
| HMC      | 13.696 (1.027) | 20.194 (1.931)     | 110.855 (3.785)         | 248.553 (11.975) | 48.137 (3.334)        | 1.070 (0.158)            | 1.073 (0.110)          | 2.931 (0.098)       |
| MAH      | 6.900 (0.676)  | 18.116 (1.272)     | 94.336 (2.592)          | 215.978 (8.195)  | 55.038 (2.302)        | 2.287 (0.107)            | 1.724 (0.077)          | 2.331 (0.071)       |
| MIL      | 9.225 (0.676)  | 14.861 (1.272)     | 113.433 (2.592)         | 234.663 (8.195)  | 66.300 (2.302)        | 1.527 (0.107)            | 1.505 (0.077)          | 2.749 (0.071)       |
| PCS      | 11.142 (0.676) | 17.111 (1.272)     | 111.027 (2.592)         | 161.935 (8.195)  | 84.270 (2.302)        | 1.071 (0.107)            | 1.069 (0.077)          | 3.180 (0.071)       |
| BHS      | 11.209 (0.689) | 14.963 (1.299)     | 101.569 (2.641)         | 141.910 (8.343)  | 58.474 (2.342)        | 1.842 (0.109)            | 1.534 (0.078)          | 2.150 (0.072)       |
| EGM      | 11.861 (2.117) | 14.346 (3.829)     | 109.594 (6.784)         | 192.419 (23.218) | 50.042 (6.589)        | 1.303 (0.277)            | 1.209 (0.179)          | 2.402 (0.181)       |
| FLF      | 10.453 (0.676) | 18.501 (1.272)     | 98.293 (2.593)          | 244.439 (8.196)  | 70.760 (2.303)        | 2.114 (0.107)            | 1.661 (0.077)          | 2.774 (0.071)       |
| JAM      | 8.079 (0.704)  | 11.902 (1.327)     | 112.695 (2.694)         | 230.686 (8.506)  | 55.544 (2.386)        | 1.259 (0.112)            | 1.084 (0.080)          | 2.484 (0.073)       |
| MFP      | 9.691 (0.942)  | 15.009 (1.774)     | 105.510 (3.508)         | 216.182 (11.062) | 42.128 (3.082)        | 1.301 (0.147)            | 1.085 (0.103)          | 2.336 (0.092)       |
| PAR      | 9.923 (0.676)  | 16.049 (1.272)     | 120.029 (2.593)         | 156.448 (8.196)  | 69.622 (2.303)        | 1.582 (0.107)            | 1.443 (0.077)          | 2.634 (0.071)       |
| BSC      | 9.532 (0.776)  | 20.251 (1.462)     | 103.459 (2.941)         | 119.810 (9.270)  | 66.803 (2.593)        | 1.023 (0.122)            | 1.002 (0.087)          | 3.272 (0.079)       |
| BVC      | 14.181 (0.676) | 21.436 (1.272)     | 101.364 (2.592)         | 68.249 (8.195)   | 64.800 (2.302)        | 1.094 (0.107)            | 1.003 (0.077)          | 3.435 (0.071)       |
| DDW      | 13.610 (0.676) | 22.039 (1.272)     | 107.031 (2.592)         | 60.436 (8.195)   | 67.564 (2.302)        | 1.018 (0.107)            | 1.003 (0.077)          | 3.271 (0.071)       |
| THT      | 12.427 (0.676) | 21.757 (1.272)     | 101.947 (2.592)         | 153.783 (8.195)  | 94.967 (2.302)        | 1.246 (0.107)            | 1.003 (0.077)          | 3.410 (0.071)       |
| VNH      | 14.467 (0.676) | 31.241 (1.272)     | 102.723 (2.592)         | 91.928 (8.195)   | 68.052 (2.302)        | 1.056 (0.107)            | 1.003 (0.077)          | 3.392 (0.071)       |
| WHC      | 13.349 (0.979) | 21.813 (1.931)     | 94.201 (3.625)          | 124.135 (11.444) | 68.767 (3.186)        | 1.787 (0.152)            | 1.145 (0.106)          | 3.055 (0.098)       |
| BHM      | 8.315 (0.675)  | 18.746 (1.272)     | 95.140 (2.591)          | 143.647 (8.195)  | 62.243 (2.302)        | 1.047 (0.107)            | 1.000 (0.077)          | 3.270 (0.071)       |
| BVM      | 13.863 (0.675) | 22.363 (1.272)     | 111.947 (2.591)         | 113.122 (8.195)  | 63.625 (2.302)        | 1.123 (0.107)            | 1.000 (0.077)          | 3.223 (0.071)       |
| IRF      | 15.291 (0.675) | 21.666 (1.299)     | 91.064 (2.591)          | 106.437 (8.195)  | 64.398 (2.302)        | 1.009 (0.107)            | 1.000 (0.077)          | 2.960 (0.072)       |
| LTM      | 18.758 (0.675) | 21.117 (1.272)     | 101.350 (2.591)         | 113.162 (8.195)  | 62.121 (2.302)        | 1.009 (0.107)            | 1.000 (0.077)          | 2.871 (0.071)       |
| Ruby     | 32.832 (0.675) | 50.734 (1.272)     | 108.842 (2.591)         | 91.295 (8.195)   | 98.590 (2.302)        | 1.123 (0.107)            | 1.000 (0.077)          | 4.096 (0.071)       |
| UpSil    | 14.190 (0.675) | 24.694 (1.272)     | 111.365 (2.591)         | 81.671 (8.195)   | 71.106 (2.302)        | 1.313 (0.107)            | 1.000 (0.077)          | 3.272 (0.071)       |

| Genotype | Reproductive branch number | Main stalk height | Stalk height containing branch | Internode between branch | Rosette width   | Rosette height  | Rosette volume          |
|----------|----------------------------|-------------------|--------------------------------|--------------------------|-----------------|-----------------|-------------------------|
| BNK      | 20.021 (0.975)             | 547.591 (16.907)  | 256.439 (9.896)                | 13.598 (0.322)           | 171.306 (7.758) | 128.054 (4.110) | 1039527.330 (72353.119) |
| ECMF     | 23.199 (0.958)             | 523.641 (16.630)  | 211.237 (9.719)                | 9.366 (0.315)            | 125.862 (7.758) | 102.801 (4.110) | 451124.529 (72353.119)  |
| HMC      | 18.898 (1.374)             | 609.620 (23.590)  | 269.797 (13.995)               | 15.259 (0.479)           | 134.886 (7.758) | 99.422 (4.110)  | 503740.771 (72353.119)  |
| MAH      | 16.773 (0.958)             | 537.162 (16.630)  | 243.053 (9.719)                | 15.762 (0.315)           | 138.915 (7.758) | 95.688 (4.110)  | 497262.932 (72353.119)  |
| MIL      | 21.070 (0.958)             | 555.126 (16.630)  | 219.303 (9.719)                | 10.878 (0.315)           | 151.485 (7.758) | 93.554 (4.110)  | 580697.239 (72353.119)  |
| PCS      | 20.385 (0.958)             | 490.880 (16.630)  | 220.654 (9.719)                | 11.300 (0.315)           | 103.946 (7.758) | 78.082 (4.110)  | 237861.173 (72353.119)  |
| BHS      | 11.825 (0.976)             | 391.289 (16.915)  | 143.953 (9.905)                | 12.724 (0.322)           | 139.292 (7.758) | 91.389 (4.110)  | 466005.940 (72353.119)  |
| EGM      | 14.285 (2.352)             | 500.284 (41.111)  | 188.118 (23.559)               | 13.946 (0.973)           | 157.019 (7.758) | 109.172 (4.110) | 736484.176 (72353.119)  |
| FLF      | 19.079 (0.959)             | 513.228 (16.637)  | 217.509 (9.727)                | 12.249 (0.316)           | 133.168 (7.758) | 81.252 (4.110)  | 381746.907 (72353.119)  |
| JAM      | 13.604 (0.995)             | 582.651 (17.225)  | 205.532 (10.100)               | 16.319 (0.329)           | 151.539 (7.758) | 89.255 (4.110)  | 551394.510 (72353.119)  |
| MFP      | 11.331 (1.279)             | 519.104 (21.968)  | 178.295 (13.032)               | 17.707 (0.440)           | 138.809 (7.758) | 95.835 (4.110)  | 488522.943 (72353.119)  |
| PAR      | 18.015 (0.959)             | 462.889 (16.637)  | 222.874 (9.727)                | 13.037 (0.316)           | 128.173 (7.758) | 80.897 (4.110)  | 349626.709 (72353.119)  |
| BSC      | 26.355 (1.081)             | 375.217 (18.653)  | 173.157 (10.994)               | 6.850 (0.362)            | 155.607 (7.758) | 106.256 (4.110) | 713541.445 (72353.119)  |
| BVC      | 19.607 (0.958)             | 253.868 (16.631)  | 101.220 (9.719)                | 5.302 (0.315)            | 132.402 (7.758) | 92.563 (4.110)  | 428893.977 (72353.119)  |
| DDW      | 20.139 (0.958)             | 281.104 (16.631)  | 149.582 (9.719)                | 7.655 (0.315)            | 148.516 (7.758) | 91.674 (4.110)  | 559464.415 (72353.119)  |
| THT      | 23.903 (0.958)             | 372.084 (16.631)  | 155.172 (9.719)                | 6.762 (0.315)            | 123.216 (7.758) | 75.313 (4.110)  | 312526.141 (72353.119)  |
| VNH      | 21.166 (0.958)             | 321.977 (16.631)  | 134.161 (9.719)                | 6.577 (0.315)            | 155.124 (7.758) | 103.589 (4.110) | 673660.943 (72353.119)  |
| WHC      | 26.201 (1.369)             | 389.527 (23.486)  | 184.113 (13.947)               | 7.270 (0.478)            | 134.335 (7.758) | 84.205 (4.110)  | 401803.703 (72353.119)  |
| BHM      | 22.476 (0.958)             | 372.986 (16.629)  | 159.491 (9.717)                | 7.566 (0.315)            | 171.124 (7.758) | 96.622 (4.110)  | 748954.235 (72353.119)  |
| BVM      | 19.244 (0.958)             | 356.838 (16.629)  | 141.294 (9.717)                | 7.787 (0.315)            | 160.972 (7.758) | 97.867 (4.110)  | 672675.083 (72353.119)  |
| IRF      | 16.037 (0.975)             | 328.344 (16.904)  | 122.690 (9.893)                | 8.335 (0.322)            | 149.691 (7.758) | 89.864 (4.110)  | 549117.862 (72353.119)  |
| LTM      | 17.115 (0.958)             | 287.840 (16.629)  | 92.969 (9.717)                 | 5.703 (0.315)            | 173.058 (7.758) | 102.846 (4.110) | 826456.977 (72353.119)  |
| Ruby     | 21.449 (0.958)             | 251.834 (16.629)  | 104.563 (9.717)                | 4.707 (0.315)            | 148.080 (7.758) | 95.199 (4.110)  | 559439.024 (72353.119)  |
| UpSil    | 16.164 (0.958)             | 295.219 (16.629)  | 104.750 (9.717)                | 6.729 (0.315)            | 147.274 (7.758) | 98.401 (4.110)  | 553895.833 (72353.119)  |

| Genotype | Rosette leaf number | Rosette fresh weight | Rosette dry weight | Rosette water weight | Rosette water proportion | Rosette leaf area | Rosette leaf packing |
|----------|---------------------|----------------------|--------------------|----------------------|--------------------------|-------------------|----------------------|
| BNK      | 25.839 (3.107)      | 1982.394 (284.576)   | 283.625 (44.103)   | 1701.250 (242.063)   | 0.857 (0.004)            | 83.753 (11.893)   | 0.095 (0.016)        |
| ECMF     | 24.269 (3.107)      | 1660.232 (284.576)   | 239.169 (44.103)   | 1420.705 (242.063)   | 0.862 (0.004)            | 68.857 (11.893)   | 0.150 (0.016)        |
| HMC      | 22.308 (3.107)      | 1533.702 (284.576)   | 228.302 (44.103)   | 1303.198 (242.063)   | 0.853 (0.004)            | 64.231 (11.893)   | 0.123 (0.016)        |
| MAH      | 26.885 (3.107)      | 1660.446 (284.576)   | 231.365 (44.103)   | 1429.592 (242.063)   | 0.866 (0.004)            | 71.576 (11.893)   | 0.149 (0.016)        |
| MIL      | 40.745 (3.107)      | 2220.347 (284.576)   | 325.513 (44.103)   | 1898.411 (242.063)   | 0.850 (0.004)            | 96.103 (11.893)   | 0.188 (0.016)        |
| PCS      | 19.954 (3.107)      | 1261.680 (284.576)   | 185.427 (44.103)   | 1072.245 (242.063)   | 0.863 (0.004)            | 53.116 (11.893)   | 0.194 (0.016)        |
| BHS      | 27.269 (3.107)      | 1815.608 (284.576)   | 274.932 (44.103)   | 1540.043 (242.063)   | 0.849 (0.004)            | 76.153 (11.893)   | 0.162 (0.016)        |
| EGM      | 23.608 (3.107)      | 2084.845 (284.576)   | 309.312 (44.103)   | 1777.580 (242.063)   | 0.850 (0.004)            | 84.858 (11.893)   | 0.131 (0.016)        |
| FLF      | 29.100 (3.107)      | 1745.861 (284.576)   | 251.223 (44.103)   | 1494.950 (242.063)   | 0.861 (0.004)            | 77.090 (11.893)   | 0.200 (0.016)        |
| JAM      | 27.662 (3.107)      | 1848.178 (284.576)   | 268.215 (44.103)   | 1580.858 (242.063)   | 0.857 (0.004)            | 74.663 (11.893)   | 0.142 (0.016)        |
| MFP      | 28.969 (3.107)      | 1811.215 (284.576)   | 273.055 (44.103)   | 1537.630 (242.063)   | 0.848 (0.004)            | 77.828 (11.893)   | 0.161 (0.016)        |
| PAR      | 27.792 (3.107)      | 1668.294 (284.576)   | 256.063 (44.103)   | 1410.139 (242.063)   | 0.846 (0.004)            | 68.991 (11.893)   | 0.192 (0.016)        |
| BSC      | 28.796 (3.107)      | 3148.146 (284.576)   | 459.659 (44.103)   | 2694.160 (242.063)   | 0.854 (0.004)            | 143.832 (11.893)  | 0.223 (0.016)        |
| BVC      | 22.127 (3.107)      | 2487.000 (284.576)   | 392.185 (44.103)   | 2092.035 (242.063)   | 0.834 (0.004)            | 112.422 (11.893)  | 0.259 (0.016)        |
| DDW      | 21.735 (3.107)      | 2564.354 (284.576)   | 359.584 (44.103)   | 2207.457 (242.063)   | 0.864 (0.004)            | 118.136 (11.893)  | 0.232 (0.016)        |
| THT      | 23.042 (3.107)      | 1999.096 (284.576)   | 329.354 (44.103)   | 1662.165 (242.063)   | 0.825 (0.004)            | 91.605 (11.893)   | 0.258 (0.016)        |
| VNH      | 21.342 (3.107)      | 2593.602 (284.576)   | 365.709 (44.103)   | 2230.607 (242.063)   | 0.864 (0.004)            | 119.117 (11.893)  | 0.185 (0.016)        |
| WHC      | 23.958 (3.107)      | 2451.002 (284.576)   | 365.709 (44.103)   | 2084.575 (242.063)   | 0.853 (0.004)            | 109.958 (11.893)  | 0.271 (0.016)        |
| BHM      | 22.385 (3.107)      | 3043.016 (284.576)   | 456.333 (44.103)   | 2587.654 (242.063)   | 0.848 (0.004)            | 130.738 (11.893)  | 0.182 (0.016)        |
| BVM      | 22.646 (3.107)      | 2729.210 (284.576)   | 389.748 (44.103)   | 2340.243 (242.063)   | 0.864 (0.004)            | 118.802 (11.893)  | 0.173 (0.016)        |
| IRF      | 22.515 (3.107)      | 3043.551 (284.576)   | 458.013 (44.103)   | 2586.337 (242.063)   | 0.847 (0.004)            | 133.472 (11.893)  | 0.255 (0.016)        |
| LTM      | 22.123 (3.107)      | 2933.307 (284.576)   | 431.833 (44.103)   | 2502.513 (242.063)   | 0.853 (0.004)            | 132.543 (11.893)  | 0.171 (0.016)        |
| Ruby     | 19.769 (3.107)      | 2502.078 (284.576)   | 364.260 (44.103)   | 2135.950 (242.063)   | 0.860 (0.004)            | 109.228 (11.893)  | 0.182 (0.016)        |
| UpSil    | 20.162 (3.107)      | 2563.039 (284.576)   | 376.213 (44.103)   | 2185.103 (242.063)   | 0.856 (0.004)            | 110.299 (11.893)  | 0.189 (0.016)        |

| Genotype | Rosette fresh weight / area | Rosette dry weight / area | Rosette water weight / area | Leaf shape Y1 | Leaf shape Y2 | Leaf shape Y3 | Leaf shape Y4 | Leaf shape Y5 |
|----------|-----------------------------|---------------------------|-----------------------------|---------------|---------------|---------------|---------------|---------------|
| BNK      | 23.657 (0.443)              | 3.381 (0.128)             | 20.302 (0.374)              | 0.894 (0.035) | 0.853 (0.039) | 0.872 (0.070) | 1.054 (0.183) | 1.882 (0.314) |
| ECMF     | 23.589 (0.443)              | 3.277 (0.128)             | 20.332 (0.374)              | 0.894 (0.035) | 0.853 (0.039) | 0.868 (0.070) | 1.006 (0.183) | 1.895 (0.314) |
| HMC      | 23.184 (0.443)              | 3.398 (0.128)             | 19.789 (0.374)              | 0.894 (0.035) | 0.859 (0.039) | 0.913 (0.070) | 1.133 (0.183) | 1.993 (0.314) |
| MAH      | 22.919 (0.443)              | 3.079 (0.128)             | 19.818 (0.374)              | 0.894 (0.035) | 0.859 (0.039) | 0.907 (0.070) | 1.208 (0.183) | 2.349 (0.314) |
| MIL      | 23.440 (0.443)              | 3.493 (0.128)             | 19.967 (0.374)              | 0.894 (0.035) | 0.857 (0.039) | 0.866 (0.070) | 1.090 (0.183) | 2.389 (0.314) |
| PCS      | 22.447 (0.443)              | 3.080 (0.128)             | 19.320 (0.374)              | 0.894 (0.035) | 0.859 (0.039) | 0.903 (0.070) | 1.027 (0.183) | 1.700 (0.314) |
| BHS      | 23.781 (0.443)              | 3.593 (0.128)             | 20.185 (0.374)              | 0.923 (0.035) | 0.921 (0.039) | 0.925 (0.070) | 1.321 (0.183) | 2.786 (0.314) |
| EGM      | 24.821 (0.443)              | 3.731 (0.128)             | 21.146 (0.374)              | 0.923 (0.035) | 0.919 (0.039) | 0.903 (0.070) | 1.032 (0.183) | 2.353 (0.314) |
| FLF      | 22.398 (0.443)              | 3.110 (0.128)             | 19.195 (0.374)              | 0.923 (0.035) | 0.921 (0.039) | 0.922 (0.070) | 1.246 (0.183) | 2.682 (0.314) |
| JAM      | 25.038 (0.443)              | 3.611 (0.128)             | 21.491 (0.374)              | 0.923 (0.035) | 0.921 (0.039) | 0.925 (0.070) | 1.202 (0.183) | 2.410 (0.314) |
| MFP      | 23.152 (0.443)              | 3.506 (0.128)             | 19.607 (0.374)              | 0.923 (0.035) | 0.923 (0.039) | 0.927 (0.070) | 1.204 (0.183) | 2.432 (0.314) |
| PAR      | 24.056 (0.443)              | 3.702 (0.128)             | 20.370 (0.374)              | 0.923 (0.035) | 0.921 (0.039) | 0.911 (0.070) | 1.112 (0.183) | 2.325 (0.314) |
| BSC      | 21.979 (0.443)              | 3.232 (0.128)             | 18.766 (0.374)              | 0.973 (0.035) | 1.031 (0.039) | 1.258 (0.070) | 2.202 (0.183) | 4.456 (0.314) |
| BVC      | 21.754 (0.443)              | 3.570 (0.128)             | 18.203 (0.374)              | 0.973 (0.035) | 1.034 (0.039) | 1.297 (0.070) | 2.631 (0.183) | 5.368 (0.314) |
| DDW      | 21.368 (0.443)              | 2.927 (0.128)             | 18.418 (0.374)              | 0.973 (0.035) | 1.034 (0.039) | 1.250 (0.070) | 2.261 (0.183) | 5.015 (0.314) |
| THT      | 20.860 (0.443)              | 3.597 (0.128)             | 17.236 (0.374)              | 0.973 (0.035) | 1.036 (0.039) | 1.266 (0.070) | 2.360 (0.183) | 4.980 (0.314) |
| VNH      | 21.451 (0.443)              | 2.938 (0.128)             | 18.495 (0.374)              | 0.973 (0.035) | 1.030 (0.039) | 1.216 (0.070) | 2.053 (0.183) | 4.651 (0.314) |
| WHC      | 22.162 (0.443)              | 3.268 (0.128)             | 18.925 (0.374)              | 0.973 (0.035) | 1.033 (0.039) | 1.265 (0.070) | 2.323 (0.183) | 4.938 (0.314) |
| BHM      | 23.379 (0.443)              | 3.559 (0.128)             | 19.863 (0.374)              | 0.915 (0.035) | 0.941 (0.039) | 1.114 (0.070) | 2.069 (0.183) | 4.689 (0.314) |
| BVM      | 22.767 (0.443)              | 3.128 (0.128)             | 19.635 (0.374)              | 0.915 (0.035) | 0.944 (0.039) | 1.132 (0.070) | 2.076 (0.183) | 4.762 (0.314) |
| IRF      | 22.712 (0.443)              | 3.453 (0.128)             | 19.263 (0.374)              | 0.915 (0.035) | 0.946 (0.039) | 1.216 (0.070) | 2.565 (0.183) | 5.685 (0.314) |
| LTM      | 22.021 (0.443)              | 3.218 (0.128)             | 18.763 (0.374)              | 0.915 (0.035) | 0.943 (0.039) | 1.138 (0.070) | 2.248 (0.183) | 5.062 (0.314) |
| Ruby     | 22.341 (0.443)              | 3.137 (0.128)             | 19.178 (0.374)              | 0.915 (0.035) | 0.943 (0.039) | 1.138 (0.070) | 1.956 (0.183) | 4.888 (0.314) |
| UpSil    | 23.167 (0.443)              | 3.339 (0.128)             | 19.853 (0.374)              | 0.915 (0.035) | 0.945 (0.039) | 1.165 (0.070) | 2.179 (0.183) | 4.969 (0.314) |

| Genotype | Leaf shape Y6 | Leaf shape Y7  | Leaf shape Y8  | Leaf shape Y9 |
|----------|---------------|----------------|----------------|---------------|
| BNK      | 3.754 (0.393) | 5.423 (0.403)  | 6.179 (0.362)  | 4.814 (0.276) |
| ECMF     | 3.957 (0.393) | 5.939 (0.403)  | 6.758 (0.362)  | 5.110 (0.276) |
| HMC      | 4.105 (0.393) | 6.119 (0.403)  | 6.792 (0.362)  | 4.999 (0.276) |
| MAH      | 4.736 (0.393) | 6.482 (0.403)  | 7.097 (0.362)  | 5.326 (0.276) |
| MIL      | 4.676 (0.393) | 6.736 (0.403)  | 7.485 (0.362)  | 6.369 (0.276) |
| PCS      | 3.863 (0.393) | 6.573 (0.403)  | 7.543 (0.362)  | 6.226 (0.276) |
| BHS      | 5.156 (0.393) | 6.920 (0.403)  | 7.303 (0.362)  | 5.787 (0.276) |
| EGM      | 4.628 (0.393) | 6.572 (0.403)  | 6.909 (0.362)  | 5.616 (0.276) |
| FLF      | 5.611 (0.393) | 7.515 (0.403)  | 7.961 (0.362)  | 6.346 (0.276) |
| JAM      | 5.145 (0.393) | 6.666 (0.403)  | 6.852 (0.362)  | 5.036 (0.276) |
| MFP      | 4.754 (0.393) | 6.393 (0.403)  | 6.682 (0.362)  | 4.994 (0.276) |
| PAR      | 4.899 (0.393) | 7.132 (0.403)  | 7.617 (0.362)  | 6.120 (0.276) |
| BSC      | 7.461 (0.393) | 9.654 (0.403)  | 10.382 (0.362) | 8.496 (0.276) |
| BVC      | 8.556 (0.393) | 11.049 (0.403) | 10.973 (0.362) | 7.646 (0.276) |
| DDW      | 8.749 (0.393) | 11.142 (0.403) | 11.335 (0.362) | 9.148 (0.276) |
| THT      | 8.456 (0.393) | 10.699 (0.403) | 11.120 (0.362) | 8.597 (0.276) |
| VNH      | 8.125 (0.393) | 10.854 (0.403) | 11.315 (0.362) | 9.016 (0.276) |
| WHC      | 8.990 (0.393) | 11.454 (0.403) | 11.831 (0.362) | 9.201 (0.276) |
| BHM      | 7.661 (0.393) | 9.653 (0.403)  | 9.872 (0.362)  | 7.509 (0.276) |
| BVM      | 8.204 (0.393) | 10.665 (0.403) | 10.741 (0.362) | 8.575 (0.276) |
| IRF      | 9.048 (0.393) | 10.968 (0.403) | 11.286 (0.362) | 8.297 (0.276) |
| LTM      | 8.182 (0.393) | 10.337 (0.403) | 10.705 (0.362) | 8.290 (0.276) |
| Ruby     | 8.058 (0.393) | 10.082 (0.403) | 10.156 (0.362) | 7.373 (0.276) |
| UpSil    | 8.493 (0.393) | 10.601 (0.403) | 10.965 (0.362) | 8.825 (0.276) |

Table S2. Trait divergence between subspecies. For all traits in 19 genotypes, shown are trait, category,  $P$ -value for subspecies in ANOVA, the subspecies with higher trait value,  $Q_{ST}$ ,  $P$ -value of  $Q_{ST}$  compared to empirical  $F_{ST}$  distribution, and the correlation with discriminant function analysis (DFA) score from each trait category.

| Trait                          | Category      | $P$ -value <sup>a</sup> | Higher <sup>b</sup> | $Q_{ST}$ | $Q_{ST} P^c$ | DFA-cor <sup>d</sup> |
|--------------------------------|---------------|-------------------------|---------------------|----------|--------------|----------------------|
| Instantaneous WUE dry          | Physiology    | 0.346                   | EAST                | -        | -            | -                    |
| Instantaneous WUE wet          | Physiology    | 0.670                   | WEST                | 0.00     | 1.000        | -                    |
| Long-term $\Delta^{13}C$ dry   | Physiology    | 0.038                   | WEST                | 0.33     | 0.270        | -                    |
| Long-term $\Delta^{13}C$ wet   | Physiology    | 0.071                   | WEST                | 0.26     | 0.314        | -                    |
| Bolting time                   | Phenology     | <b>0.001</b>            | WEST                | 0.66     | 0.128        | 0.84                 |
| Flowering time                 | Phenology     | 0.065                   | WEST                | 0.29     | 0.290        | 0.44                 |
| Flowering duration             | Phenology     | <b>&lt; 0.001</b>       | WEST                | 0.75     | 0.103        | 0.63                 |
| Flowering rosette width        | Phenology     | 0.983                   | EAST                | 0.00     | 1.000        | 0.09                 |
| Flowering height               | Phenology     | <b>&lt; 0.001</b>       | EAST                | 0.74     | 0.107        | -0.83                |
| Flowering leaf number          | Phenology     | 0.072                   | WEST                | 0.29     | 0.315        | 0.28                 |
| Flowering rosette number       | Phenology     | 0.096                   | EAST                | 0.06     | 0.614        | -0.29                |
| Flowering stalk number         | Phenology     | <b>0.010</b>            | EAST                | 0.31     | 0.276        | -0.39                |
| Main stalk diameter            | Morph-stalk   | <b>&lt; 0.001</b>       | WEST                | 0.66     | 0.123        | 0.65                 |
| Reproductive branch number     | Morph-stalk   | <b>0.044</b>            | WEST                | 0.18     | 0.406        | 0.22                 |
| Main stalk height              | Morph-stalk   | <b>&lt; 0.001</b>       | EAST                | 0.82     | 0.062        | -0.78                |
| Stalk height containing branch | Morph-stalk   | <b>0.002</b>            | EAST                | 0.59     | 0.157        | -0.55                |
| Internode between branch       | Morph-stalk   | <b>&lt; 0.001</b>       | EAST                | 0.88     | <b>0.048</b> | -0.87                |
| Rosette width                  | Morph-rosette | 0.149                   | WEST                | 0.11     | 0.501        | 0.27                 |
| Rosette height                 | Morph-rosette | 0.618                   | EAST                | 0.00     | 1.000        | -0.12                |
| Rosette volume                 | Morph-rosette | 0.400                   | WEST                | 0.00     | 1.000        | 0.17                 |
| Rosette leaf number            | Morph-rosette | 0.743                   | EAST                | 0.00     | 1.000        | -0.03                |
| Rosette fresh weight           | Morph-rosette | <b>0.001</b>            | WEST                | 0.72     | 0.107        | 0.53                 |
| Rosette dry weight             | Morph-rosette | <b>&lt; 0.001</b>       | WEST                | 0.77     | 0.088        | 0.52                 |
| Rosette water weight           | Morph-rosette | <b>0.001</b>            | WEST                | 0.71     | 0.109        | 0.52                 |
| Rosette water proportion       | Morph-rosette | 0.468                   | EAST                | 0.00     | 1.000        | -0.16                |
| Rosette leaf area              | Morph-rosette | <b>&lt; 0.001</b>       | WEST                | 0.79     | 0.071        | 0.60                 |
| Rosette leaf packing           | Morph-rosette | <b>0.004</b>            | WEST                | 0.56     | 0.167        | 0.60                 |
| Rosette fresh weight / area    | Morph-rosette | 0.025                   | EAST                | 0.42     | 0.216        | -0.40                |
| Rosette dry weight / area      | Morph-rosette | 0.631                   | EAST                | 0.00     | 1.000        | -0.10                |
| Rosette water weight / area    | Morph-rosette | 0.019                   | EAST                | 0.42     | 0.215        | -0.43                |
| Leaf shape Y1                  | Morph-leaf    | 0.392                   | WEST                | 0.00     | 1.000        | 0.11                 |
| Leaf shape Y2                  | Morph-leaf    | 0.042                   | WEST                | 0.50     | 0.185        | 0.30                 |
| Leaf shape Y3                  | Morph-leaf    | <b>&lt; 0.001</b>       | WEST                | 0.87     | 0.061        | 0.53                 |
| Leaf shape Y4                  | Morph-leaf    | <b>&lt; 0.001</b>       | WEST                | 0.94     | <b>0.029</b> | 0.80                 |
| Leaf shape Y5                  | Morph-leaf    | <b>&lt; 0.001</b>       | WEST                | 0.93     | <b>0.029</b> | 0.87                 |
| Leaf shape Y6                  | Morph-leaf    | <b>&lt; 0.001</b>       | WEST                | 0.93     | <b>0.029</b> | 0.91                 |
| Leaf shape Y7                  | Morph-leaf    | <b>&lt; 0.001</b>       | WEST                | 0.93     | <b>0.029</b> | 0.94                 |
| Leaf shape Y8                  | Morph-leaf    | <b>&lt; 0.001</b>       | WEST                | 0.94     | <b>0.028</b> | 0.95                 |
| Leaf shape Y9                  | Morph-leaf    | <b>&lt; 0.001</b>       | WEST                | 0.92     | <b>0.029</b> | 0.93                 |

- a. Boldface denotes significant  $P$ -values after sequential Bonferroni correction within each trait category.
- b. This column denotes which subspecies has the higher trait value.
- c. Empirical  $P$ -values, based on the proportion of polymorphic SNPs with  $F_{ST}$  higher than or equal to  $Q_{ST}$  for this trait. Boldface denotes values less than 0.05.
- d. Pearson's correlation coefficient between trait value and the DFA score of each trait category. DFA is not available for physiology traits.



Table S3. Divergence of the ‘composite trait’ from each trait category. This table shows the data from 19 genotypes. For DFA scores from each trait category, this table shows the subspecies effect  $P$ -value in univariate ANOVA, the  $Q_{ST}$ , and the empirical  $P$  value of  $Q_{ST}$  compared to genome-wide distribution of SNP  $F_{ST}$ .

| Trait category       | ANOVA $P$ | $Q_{ST}$ | $P$ vs. $F_{ST}$ |
|----------------------|-----------|----------|------------------|
| Phenology            | < 0.001   | 0.87     | 0.061            |
| Morphology – stalk   | < 0.001   | 0.91     | 0.029            |
| Morphology – rosette | < 0.001   | 0.97     | 0.028            |
| Morphology – leaf    | < 0.001   | 0.97     | 0.028            |

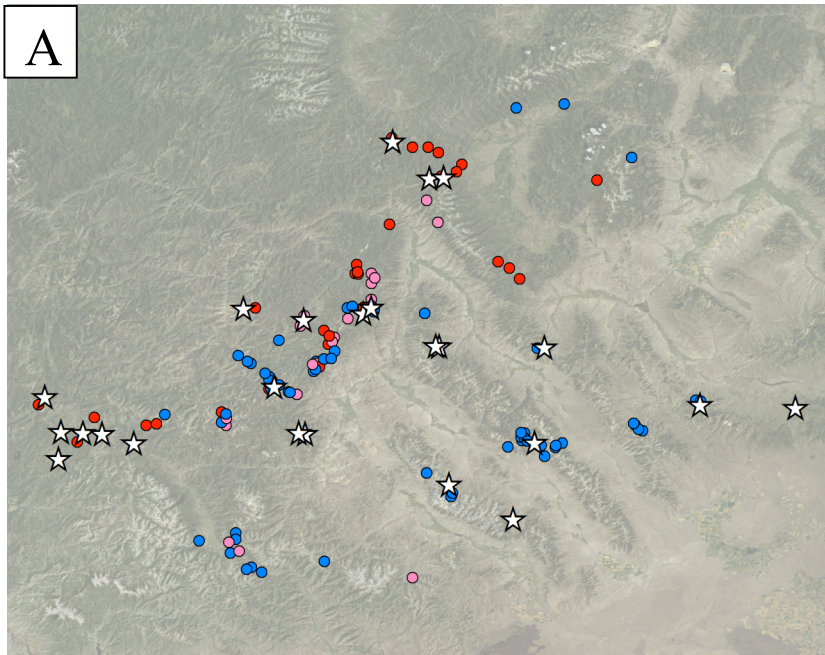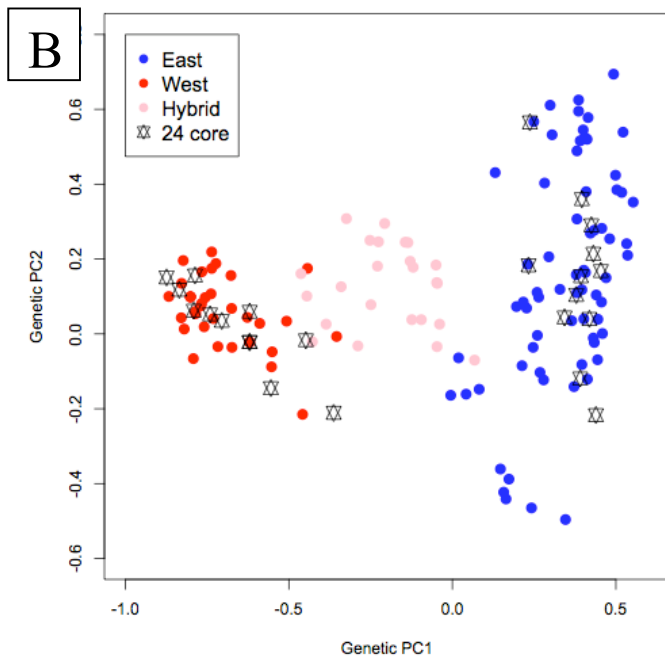

Figure S1. The 24 genotypes represent most of the (A) geographical and (B) genetic variation among all *Boecheera stricta* accessions in our study area (Latitude: 43.50 to 46.00 N, Longitude: 111.00 to 116.00 W). In both panels, white stars represent 24 core genotypes used in this study, blue dots represent EASTERN genotypes, red dots represent WESTERN genotypes, and pink dots represent hybrids. All data are obtained from Lee and Mitchell-Olds (2011). Genetic groups (EAST/WEST/hybrid) were assigned by STRUCTURE.

**A**

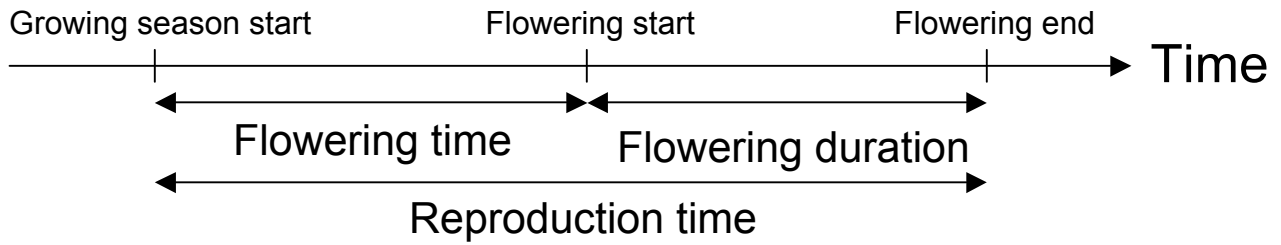

**B**

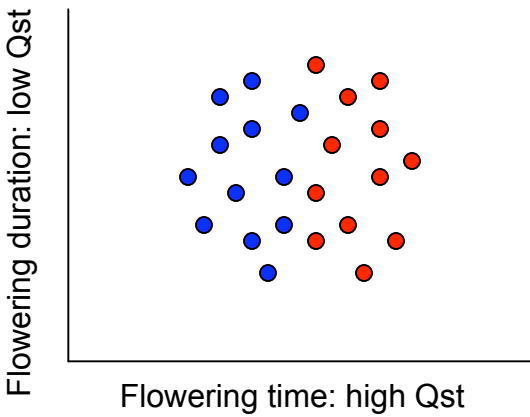

**C**

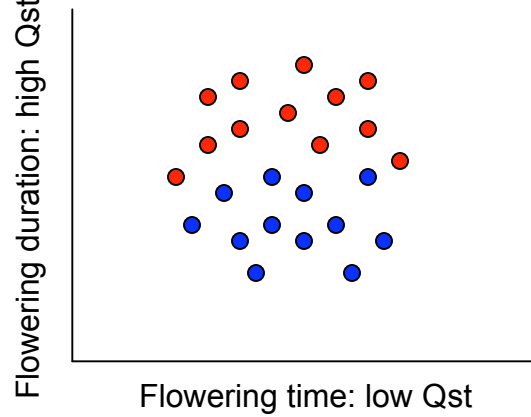

**D**

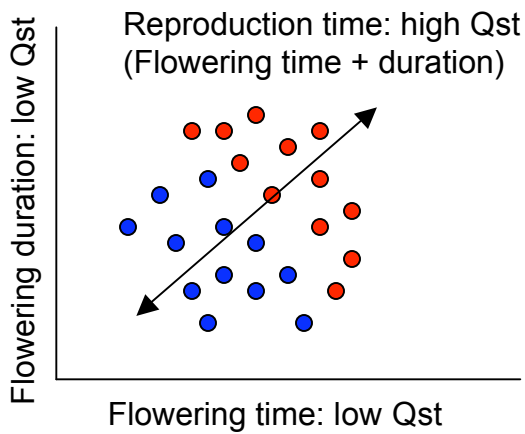

**E**

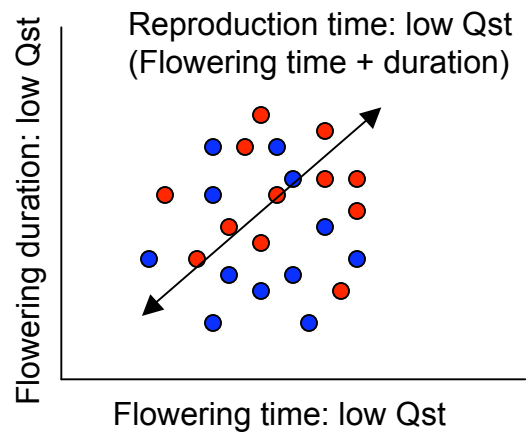

Figure S2: Example of multivariate trait divergence in phenology, assuming natural selection favors the divergence in 'total reproduction time' between the red and blue population. Each point represents one genotype. (A) This trait, although not directly measured, is a linear combination of flowering time and duration. The two populations may diverge in either flowering time (B), duration (C), or both (D). In examples (B) and (C), the traits under divergent selection could be identified via their high  $Q_{st}$ . In case (D), however, no univariate trait has  $Q_{st}$  higher than the significance threshold, and the divergent selection on phenology as a whole might not be identified. Nevertheless, these three examples all have the same amount of divergence in total reproduction time. In case (D), the composite trait under strongest divergent selection (and therefore its  $Q_{st}$ ) could be identified via discriminant function analysis or MANOVA between the two populations. Notice that this method only involves a rotation of axis and does not produce an upward bias in multivariate  $Q_{st}$ . Finally, in (E) if none of the univariate or multivariate traits has diverged, the multivariate  $Q_{st}$  also will be low.

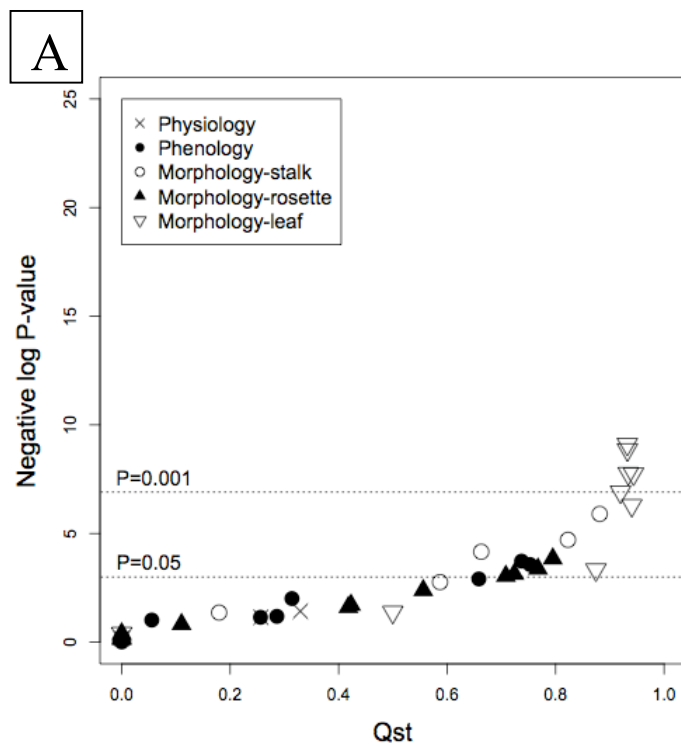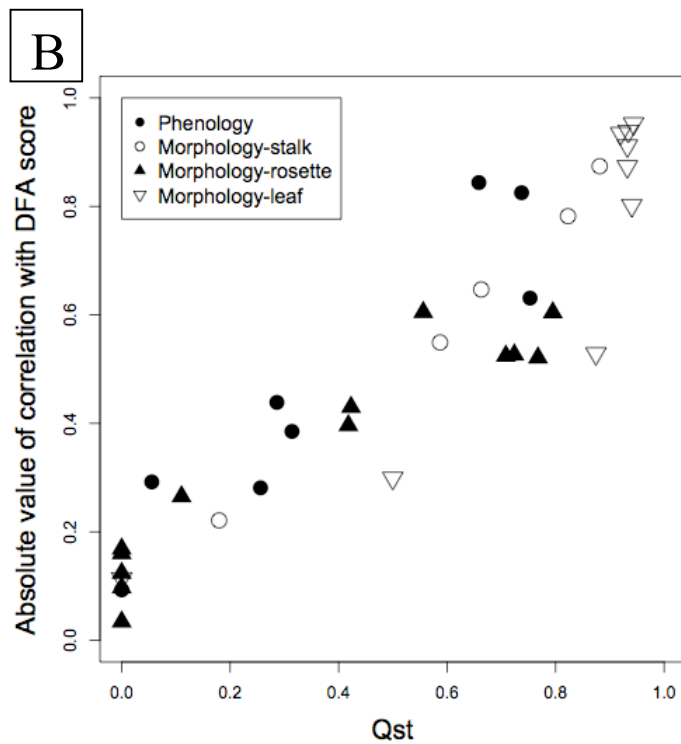

Figure S3. Relationship between trait  $Q_{ST}$  and (A)  $P$  value of subspecies effect in ANOVA (B) absolute value of correlation with discriminant function analysis (DFA) score from each trait category. Shown are data from 19 genotypes. All axes and scales are equivalent to Figure 3.
